# Supplementary material for: Impact of cross-linking on the time–temperature superposition of creep rupture in epoxy resins
Source: Royal Society of Chemistry journal article supplement (doi:10.1039/d4sm01540a), 2025-01-01
Supplement: d4sm01540a1.pdf [file d4sm01540a1.pdf]

# Electronic Supplementary Information

## Impact of Cross-linking on the Time-temperature Superposition of Creep Rupture in Epoxy Resins

Atsuomi Shundo,<sup>a\*</sup> Mika Aoki,<sup>b</sup> Satoru Yamamoto,<sup>b</sup> and Keiji Tanaka<sup>a,b,c\*</sup>

<sup>a</sup> *Department of Applied Chemistry, Kyushu University, Fukuoka 819-0395, Japan*

<sup>b</sup> *Center for Polymer Interface and Molecular Adhesion Science, Kyushu University, Fukuoka 819-0395, Japan*

<sup>c</sup> *Department of Automotive Science, Kyushu University, Fukuoka 819-0395, Japan*

### Contents

1. Stress-strain curves from tensile testing
2. Time-domain curves of creep compliance
3. Rupture time plotted against imposed stress
4. References

## 1. Stress-strain curves from tensile testing.

Fig. S1 shows the stress-strain ( $S$ – $S$ ) curves for (a) ER12, (b) ER6, and (c) ER2 at various temperatures ranging from 358 to 438 K. For all samples, the  $S$ – $S$  curves exhibited initial elasticity, yielding, necking, and strain-hardening regions before rupture at lower temperatures. As the temperature increased, the yielding and necking regions became less pronounced. At higher temperatures, the stress initially increased with strain, reached a plateau or became less distinct, and then increased again before rupture. Such behavior is commonly observed in rubbery materials.<sup>S1–S4</sup> Notably, the rupture strain decreased in the order of ER12 > ER6 > ER2. This trend can be explained by considering that, as the diamine length, corresponding to the distance between cross-linking points, decreases, the population of chains in an extended state increases, making the chains more susceptible to scission.<sup>S5–S7</sup>

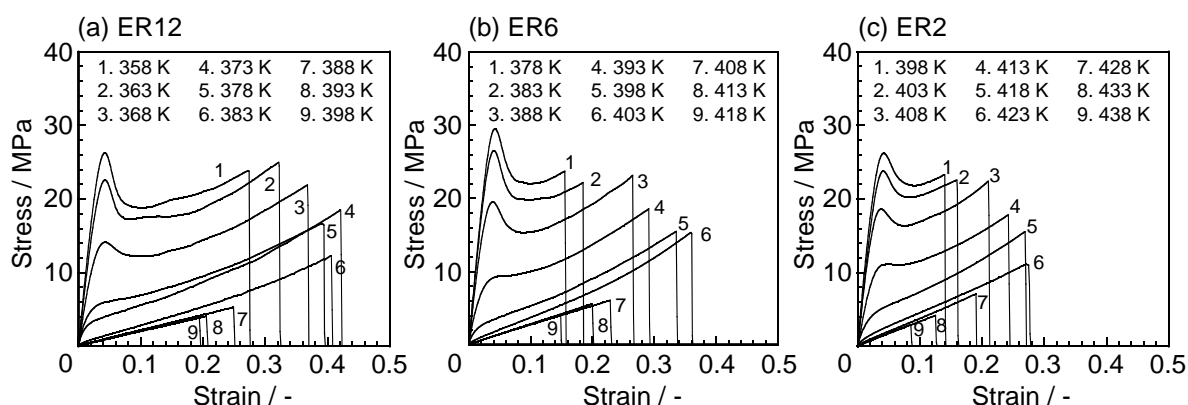

**Fig. S1** Stress-strain curves for (a) ER12, (b) ER6 and (c) ER2 at various temperatures.

## 2. Time-domain curves of creep compliance.

Fig. S2 shows the time dependence of creep compliance,  $J(t)$ , for (a) ER12, (b) ER6, and (c) ER2 at various temperatures. At low temperatures,  $J(t)$  for all samples initially remained almost unchanged over a certain period before starting to increase with time. As the temperature increased, the induction period disappeared and  $J(t)$  increased steadily over time, eventually reaching a plateau. At higher temperatures, the  $J(t)$  values were markedly higher and became independent of time. By horizontally and vertically shifting the high-temperature time-domain

data to align with the data at the reference temperature (the glass transition temperature in this study), master curves were constructed, as shown in Fig. 2 of the main text.

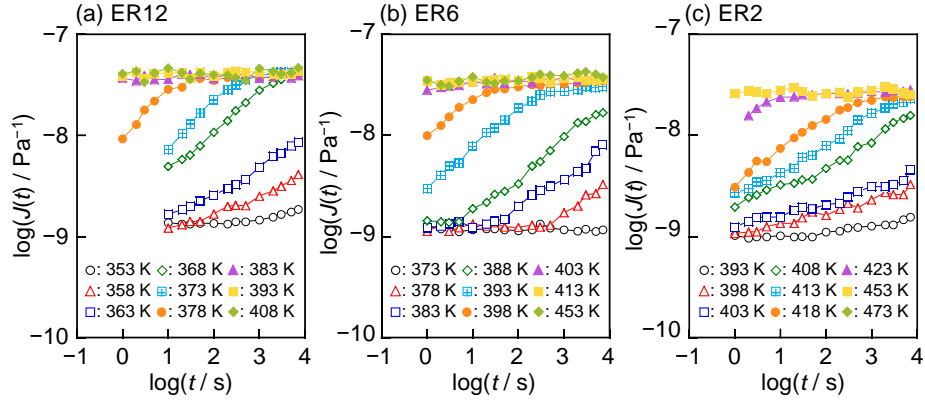

**Fig. S2** Time dependence of  $J(t)$  for (a) ER12, (b) ER6 and (c) ER2 obtained at various temperatures.

### 3. Rupture time plotted against imposed stress.

Creep tests were conducted under high stress levels, exceeding the linear response regime. The  $J(t)$  value increased continuously until the specimen ruptured, as shown in Fig. 4 of the main text. The rupture time ( $t_{rp}$ ) was acquired at various temperatures. Fig. S3 shows the relationship between  $t_{rp}$  and the imposed stress ( $\sigma$ ) for (a) ER12, (b) ER6, and (c) ER2 at various temperatures. For all samples,  $t_{rp}$  decreased as  $\sigma$  value and temperature increased. By applying horizontal shifting, these plots were superimposed to create a master curve, as shown in Fig. 5 of the main text.

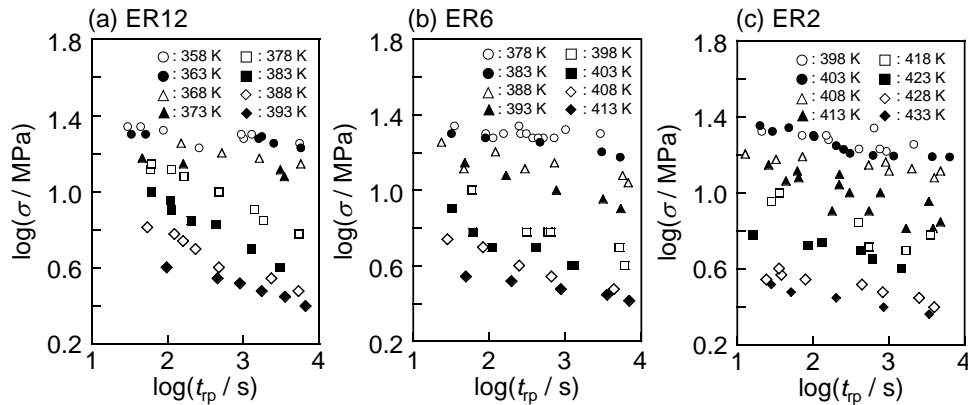

**Fig. S3** Plots of rupture time against imposed stress for (a) ER12, (b) ER6 and (c) ER2 obtained at various temperatures.

#### 4. References.

- S1 T. L. Smith, Ultimate tensile properties of elastomers. II. Comparison of failure envelopes for unfilled vulcanizates. *J. Appl. Phys.*, 1964, **35**, 27–36.
- S2 T. L. Smith, Ultimate tensile properties of elastomers. I. Characterization by a time and temperature independent failure envelope. *J. Polym. Sci. A*, 1963, **1**, 3597–3615.
- S3 T. L. Smith and J. E. Frederick, Ultimate tensile properties of elastomers. IV. Dependence of the failure envelope, maximum extensibility, and equilibrium stress-strain curve on network characteristics. *J. Appl. Phys.*, 1963, **36**, 2996–3005.
- S4 T. L. Smith and W. H. Chu, Ultimate tensile properties of elastomers. VII. Effect of crosslink density on timetemperature dependence. *J. Polym. Sci. A*, 1972, **10**, 133–150.
- S5 D. Wang, A. A. K. Klaassen, G. E. Janssen, E. de Boer and R. J. Meier, The detection of radicals in strained, high-modulus polyethylene fibres. *Polymer*, 1995, **36**, 4193–4196.
- S6 B. Crist Jr., J. Oddershede, J. R. Sabin, J. W. Perram and M. A. Ratner, Polymer fracture—A simple model for chain scission. *J. Polym. Sci., Polym. Phys. Ed*, 1984, **22**, 881–897.
- S7 R. Puthur and K. L. Sebastian, Theory of polymer breaking under tension. *Phys. Rev. B*, 2002, **66**, 024304.
